# Supplementary material
Source: MDPI journal article supplement (https://www.mdpi.com/2073-4395/14/5/919)
Supplement: s1 [file s1]

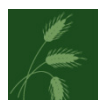

**Supplement:**

Table S1. Effect of N fertilizer management on the height of ZLY819.

| Year    | Treatment |    | Tillering stage | Boot stage      | Heading stage   | Filling stage  | Maturity Stage  |                |
|---------|-----------|----|-----------------|-----------------|-----------------|----------------|-----------------|----------------|
| 2020    | N0        | N0 | 55.63 ± 1.86c   | 60.17 ± 3.78c   | 77.95 ± 1.65e   | 78.73 ± 0.62e  | 78.77 ± 1.33d   |                |
|         |           | P1 | N1              | 63.30 ± 1.02b   | 77.13 ± 1.31b   | 85.47 ± 2.22d  | 86.9 ± 1.51d    | 86.95 ± 0.41c  |
|         |           |    | N2              | 65.57 ± 1.96ab  | 79.47 ± 3.46ab  | 89.27 ± 1.2bcd | 92.43 ± 2.13abc | 92.75 ± 0.62a  |
|         | N3        | N3 | 65.67 ± 1.15ab  | 81.83 ± 3.59ab  | 91.87 ± 2.86ab  | 92.90 ± 1.77ab | 93.47 ± 2.33a   |                |
|         |           | P2 | N1              | 63.87 ± 0.95b   | 79.17 ± 5.82ab  | 87.87 ± 1.70cd | 88.73 ± 1.33cd  | 88.97 ± 1.43bc |
|         |           |    | N2              | 66.00 ± 2.20ab  | 82.90 ± 2.11ab  | 92.90 ± 1.99ab | 92.53 ± 2.16abc | 93.20 ± 1.82a  |
|         | N3        | N3 | 66.10 ± 1.21ab  | 84.07 ± 3.28a   | 93.17 ± 2.02ab  | 94.90 ± 2.75a  | 95.30 ± 1.35a   |                |
|         |           | P3 | N1              | 64.43 ± 1.92ab  | 80.33 ± 2.15ab  | 89.90 ± 1.36ab | 89.87 ± 1.76bcd | 90.15 ± 0.34b  |
|         |           |    | N2              | 67.63 ± 2.55a   | 84.73 ± 1.51a   | 94.30 ± 1.39a  | 95.43 ± 1.97a   | 95.17 ± 1.65a  |
|         | average   | N3 | 68.03 ± 1.80a   | 85.03 ± 2.72a   | 95.20 ± 2.160a  | 95.47 ± 2.00a  | 96.03 ± 1.85a   |                |
|         |           | P1 | 64.84           | 79.48           | 88.87           | 90.74          | 91.06           |                |
|         |           | P2 | 65.32           | 82.04           | 91.31           | 92.06          | 92.49           |                |
|         |           | P3 | 66.7            | 83.37           | 93.13           | 93.59          | 93.78           |                |
| 2021    | N0        | N0 | 52.57 ± 3.07d   | 59.80 ± 1.10e   | 82.27 ± 1.72c   | 83.7 ± 2.97c   | 86.60 ± 2.54b   |                |
|         |           | P1 | N1              | 57.80 ± 1.16c   | 71.97 ± 2.69d   | 87.23 ± 1.76b  | 89.13 ± 0.92b   | 91.93 ± 0.66a  |
|         |           |    | N2              | 59.60 ± 1.64bc  | 75.30 ± 2.35bcd | 91.07 ± 1.96ab | 92.23 ± 1.51ab  | 92.60 ± 1.27a  |
|         | N3        | N3 | 61.93 ± 1.13abc | 75.87 ± 1.99bcd | 92.90 ± 2.26a   | 93.67 ± 1.52a  | 93.43 ± 2.39a   |                |
|         |           | P2 | N1              | 59.70 ± 1.15bc  | 72.93 ± 3.32cd  | 90.40 ± 2.49ab | 90.97 ± 2.00ab  | 92.67 ± 1.33a  |
|         |           |    | N2              | 61.23 ± 2.49abc | 76.93 ± 1.83abc | 92.50 ± 2.21a  | 92.60 ± 1.96ab  | 93.47 ± 2.66a  |
|         | N3        | N3 | 63.70 ± 2.20ab  | 78.07 ± 1.56ab  | 93.27 ± 1.96a   | 93.50 ± 2.25a  | 93.67 ± 0.87a   |                |
|         |           | P3 | N1              | 60.77 ± 1.03abc | 74.27 ± 2.12bcd | 91.33 ± 2.74a  | 91.17 ± 2.00ab  | 93.13 ± 0.86a  |
|         |           |    | N2              | 62.90 ± 1.53ab  | 78.43 ± 2.16ab  | 93.63 ± 1.20a  | 92.77 ± 1.27ab  | 94.27 ± 1.97a  |
|         | average   | N3 | 64.47 ± 3.17a   | 80.77 ± 1.25a   | 94.07 ± 1.07a   | 94.57 ± 2.05a  | 94.67 ± 1.97a   |                |
|         |           | P1 | 59.78           | 74.38           | 90.4            | 91.68          | 92.66           |                |
|         |           | P2 | 61.54           | 75.98           | 92.06           | 92.36          | 93.27           |                |
|         |           | P3 | 62.71           | 77.82           | 93.01           | 92.83          | 94.02           |                |
| F value | Y         |    | 51.16**         | 37.46**         | NS              | NS             | NS              |                |
|         | P         |    | 5.35**          | 5.44**          | 9.11**          | 3.42*          | 5.52**          |                |
|         | N         |    | 10.71           | 10.69**         | 18.40**         | 20.56**        | 20.89**         |                |
|         | Y×P       |    | NS              | NS              | NS              | NS             | NS              |                |
|         | Y×N       |    | NS              | NS              | NS              | NS             | 9.18**          |                |
|         | P×N       |    | NS              | NS              | NS              | NS             | NS              |                |
|         | Y×P×N     |    | NS              | NS              | NS              | NS             | NS              |                |

Y: year,P: the frequency of N application, N: amount of N application; the same letter after a number in the same column indicates that the treatments did not reach a significant level ( $p > 0.05$ ). NS, not significant( $p > 0.05$ ); \* and \*\*, significant at  $P=0.05$  and  $P=0.01$ , respectively.

Table S2. Effect of N fertilizer management on aboveground biomass of ZLY819.

| Year    | Treatment | Tillering stage<br>(g m <sup>-2</sup> ) | Boot stage<br>(g m <sup>-2</sup> ) | Heading stage<br>(g m <sup>-2</sup> ) | Filling stage<br>(g m <sup>-2</sup> ) | Maturity Stage<br>(g m <sup>-2</sup> ) |                    |
|---------|-----------|-----------------------------------------|------------------------------------|---------------------------------------|---------------------------------------|----------------------------------------|--------------------|
| 2020    | P1        | N0                                      | 137.96 ± 12.56d                    | 239.17 ± 33.57c                       | 425.88 ± 22.62f                       | 537.85 ± 23.18e                        | 761.70 ± 20.38f    |
|         |           | N1                                      | 188.42 ± 33.37c                    | 407.43 ± 50.12b                       | 625.03 ± 37.77e                       | 745.73 ± 42.30d                        | 994.30 ± 8.580e    |
|         |           | N2                                      | 208.89 ± 22.48bc                   | 487.05 ± 62.55ab                      | 757.88 ± 13.33bc                      | 903.34 ± 76.79abc                      | 1184.61 ± 48.05bc  |
|         |           | N3                                      | 233.82 ± 23.35ab                   | 503.98 ± 77.87a                       | 752.44 ± 33.03bc                      | 869.61 ± 63.10bc                       | 1203.99 ± 26.72ab  |
|         | P2        | N1                                      | 191.01 ± 10.52bc                   | 394.81 ± 53.61b                       | 662.49 ± 8.10de                       | 833.59 ± 65.67cd                       | 1095.3 ± 31.30d    |
|         |           | N2                                      | 214.30 ± 17.98bc                   | 420.19 ± 14.74ab                      | 792.28 ± 10.89ab                      | 900.02 ± 45.66abc                      | 1241.71 ± 72.65ab  |
|         |           | N3                                      | 233.44 ± 20.77ab                   | 422.74 ± 41.58ab                      | 759.97 ± 8.91b                        | 885.42 ± 39.94abc                      | 1189.07 ± 8.11b    |
|         | P3        | N1                                      | 228.81 ± 42.55abc                  | 448.69 ± 58.05ab                      | 694.02 ± 72.96cd                      | 865.39 ± 20.88bc                       | 1108.69 ± 40.37cd  |
|         |           | N2                                      | 260.12 ± 36.85a                    | 472.23 ± 68.40ab                      | 828.63 ± 71.06a                       | 975.71 ± 57.43a                        | 1278.48 ± 77.98a   |
|         |           | N3                                      | 229.26 ± 19.64abc                  | 504.76 ± 61.24a                       | 778.94 ± 22.87ab                      | 939.86 ± 88.54ab                       | 1234.16 ± 63.47ab  |
|         | average   | P1                                      | 210.38                             | 466.15                                | 711.787                               | 839.56                                 | 1127.63            |
|         |           | P2                                      | 212.92                             | 412.58                                | 738.25                                | 873.01                                 | 1175.36            |
|         |           | P3                                      | 239.4                              | 475.23                                | 767.19                                | 926.99                                 | 1207.11            |
| 2021    | P1        | N0                                      | 153.80 ± 15.29b                    | 325.80 ± 4.04d                        | 481.76 ± 5.40e                        | 497.07 ± 26.41e                        | 944.00 ± 38.12g    |
|         |           | N1                                      | 164.45 ± 6.00ab                    | 402.30 ± 22.39c                       | 668.84 ± 6.03c                        | 612.93 ± 6.08d                         | 1198.20 ± 56.33f   |
|         |           | N2                                      | 162.65 ± 10.18ab                   | 430.20 ± 7.36.00ab                    | 761.43 ± 16.61b                       | 672.13 ± 11.76c                        | 1322.50 ± 33.26cde |
|         |           | N3                                      | 176.35 ± 42.00ab                   | 400.62 ± 10.03c                       | 779.82 ± 11.13ab                      | 731.38 ± 17.39b                        | 1353.35 ± 66.61bcd |
|         | P2        | N1                                      | 173.00 ± 34.05ab                   | 420.12 ± 16.56abc                     | 612.14 ± 3.84d                        | 630.55 ± 33.12d                        | 1255.40 ± 26.55ef  |
|         |           | N2                                      | 195.83 ± 17.80a                    | 419.59 ± 23.51abc                     | 762.25 ± 30.25b                       | 817.13 ± 15.72a                        | 1383.85 ± 32.57abc |
|         |           | N3                                      | 193.49 ± 9.37a                     | 418.33 ± 13.00abc                     | 767.22 ± 7.87b                        | 744.89 ± 17.02b                        | 1418.25 ± 37.51ab  |
|         | P3        | N1                                      | 189.45 ± 24.69ab                   | 407.34 ± 9.09bc                       | 679.83 ± 12.81c                       | 682.92 ± 19.27c                        | 1292.95 ± 46.77de  |
|         |           | N2                                      | 190.50 ± 19.95ab                   | 435.27 ± 2.29a                        | 781.16 ± 10.50ab                      | 719.38 ± 24.42b                        | 1416.65 ± 37.80ab  |
|         |           | N3                                      | 187.00 ± 8.11ab                    | 407.18 ± 28.68bc                      | 799.47 ± 22.38a                       | 721.40 ± 18.87b                        | 1437.65 ± 53.71a   |
|         | average   | P1                                      | 167.82                             | 411.04                                | 736.7                                 | 672.15                                 | 1291.35            |
|         |           | P2                                      | 187.44                             | 419.35                                | 713.87                                | 730.86                                 | 1352.5             |
|         |           | P3                                      | 188.98                             | 416.6                                 | 753.49                                | 707.9                                  | 1382.42            |
| F value | Y         | 34.05**                                 | 9.76**                             | NS                                    | 217**                                 | 181.89**                               |                    |
|         | P         | 4.61*                                   | NS                                 | 8.35**                                | 9.59**                                | 15.27**                                |                    |
|         | N         | NS                                      | NS                                 | 96.71**                               | 28.61**                               | 59.73**                                |                    |
|         | Y×P       | NS                                      | 3.46*                              | 3.39*                                 | 3.59*                                 | NS                                     |                    |
|         | Y×N       | NS                                      | NS                                 | NS                                    | NS                                    | NS                                     |                    |
|         | P×N       | NS                                      | NS                                 | NS                                    | NS                                    | NS                                     |                    |
|         | Y×P×N     | NS                                      | NS                                 | NS                                    | 2.94*                                 | NS                                     |                    |

Y: year, P: Frequency of N application, N: amount of N application; Values followed by different lowercase letters indicate significant difference among treatments at 5% level. NS, not significant( $p > 0.05$ ); \* and \*\*, significant at  $P=0.05$  and  $P=0.01$ , respectively.

Table S3. Effects of N fertilizer management on dry matter growth rate, transport rate, and contribution rate of ZLY819.

| Year    | Treatme<br>nt | Crop growth rate (g m <sup>-2</sup> d <sup>-1</sup> ) |                 |                 | Transfer rate of<br>dry matter (%) | Contribution<br>rate of dry<br>matter (%) |
|---------|---------------|-------------------------------------------------------|-----------------|-----------------|------------------------------------|-------------------------------------------|
|         |               | TP-MT                                                 | MT-HD           | HD-MA           |                                    |                                           |
| 2020    | N0            | 4.93 ± 0.45d                                          | 9.60 ± 0.36e    | 13.99 ± 0.58c   | 20.23 ± 0.86f                      | 9.51 ± 0.54e                              |
|         | P1 N1         | 6.73 ± 1.19c                                          | 14.55 ± 2.27d   | 15.39 ± 1.77bc  | 25.47 ± 0.86e                      | 12.87 ± 0.58d                             |
|         | N2            | 7.46 ± 0.80bc                                         | 18.30 ± 0.59ab  | 17.78 ± 1.45ab  | 29.17 ± 4.18bcd                    | 14.92 ± 2.07abc                           |
|         | N3            | 8.35 ± 0.83ab                                         | 17.29 ± 1.05abc | 18.81 ± 1.04a   | 27.13 ± 0.73de                     | 14.20 ± 0.58bcd                           |
|         | P2 N1         | 6.82 ± 0.38bc                                         | 15.72 ± 0.58bcd | 18.03 ± 1.48ab  | 26.74 ± 1.87de                     | 13.13 ± 0.52cd                            |
|         | N2            | 7.65 ± 0.64bc                                         | 19.27 ± 0.91a   | 18.73 ± 2.60a   | 32.02 ± 1.69abc                    | 15.87 ± 1.40ab                            |
|         | N3            | 8.34 ± 0.74ab                                         | 17.55 ± 0.76abc | 17.88 ± 0.31ab  | 29.68 ± 2.89bcd                    | 15.18 ± 0.93abc                           |
|         | P3 N1         | 8.17 ± 1.52abc                                        | 15.51 ± 3.57cd  | 17.28 ± 2.44ab  | 28.45 ± 1.16cde                    | 13.87 ± 2.55bc                            |
|         | N2            | 9.29 ± 1.32a                                          | 18.95 ± 1.48a   | 18.74 ± 0.52a   | 34.54 ± 5.06a                      | 17.03 ± 2.65a                             |
|         | N3            | 8.19 ± 0.70abc                                        | 18.32 ± 1.24ab  | 18.97 ± 3.59a   | 33.29 ± 1.29ab                     | 15.64 ± 0.96ab                            |
| average | P1            | 7.51                                                  | 16.71           | 17.33           | 27.25                              | 6.56                                      |
|         | P2            | 7.60                                                  | 17.51           | 18.21           | 29.48                              | 7.08                                      |
|         | P3            | 8.55                                                  | 17.59           | 18.33           | 32.10                              | 7.72                                      |
| 2021    | N0            | 5.49 ± 0.55b                                          | 10.93 ± 0.61d   | 19.26 ± 1.37e   | 21.68 ± 1.58de                     | 8.21 ± 1.10cd                             |
|         | P1 N1         | 5.87 ± 0.21ab                                         | 16.81 ± 0.40b   | 22.06 ± 2.17de  | 20.52 ± 1.55de                     | 8.30 ± 1.74cd                             |
|         | N2            | 5.81 ± 0.36ab                                         | 19.96 ± 0.79a   | 23.38 ± 1.34cd  | 27.32 ± 2.33abc                    | 11.24 ± 1.07ab                            |
|         | N3            | 6.30 ± 1.50ab                                         | 20.12 ± 1.75a   | 23.9 ± 2.86bcd  | 21.58 ± 0.66de                     | 9.43 ± 2.29bc                             |
|         | P2 N1         | 6.18 ± 1.22ab                                         | 14.64 ± 1.17c   | 26.80 ± 1.06ab  | 17.69 ± 2.60e                      | 6.11 ± 0.85d                              |
|         | N2            | 6.99 ± 0.64a                                          | 18.88 ± 1.53a   | 25.90 ± 0.59abc | 21.68 ± 4.27de                     | 8.70 ± 0.47c                              |
|         | N3            | 6.91 ± 0.33a                                          | 19.12 ± 0.22a   | 27.13 ± 1.80a   | 31.67 ± 4.55a                      | 12.09 ± 1.44a                             |
|         | P3 N1         | 6.77 ± 0.88ab                                         | 16.35 ± 0.88b   | 25.55 ± 1.51abc | 23.12 ± 3.65cd                     | 8.79 ± 1.21c                              |
|         | N2            | 6.80 ± 0.71ab                                         | 19.69 ± 0.38a   | 26.48 ± 1.59ab  | 28.67 ± 3.42ab                     | 11.29 ± 1.27ab                            |
|         | N3            | 6.68 ± 0.29ab                                         | 20.42 ± 0.93a   | 26.59 ± 2.17ab  | 24.24 ± 2.97bcd                    | 10.21 ± 1.74abc                           |
| average | P1            | 5.99                                                  | 18.96           | 23.11           | 23.14                              | 9.66                                      |
|         | P2            | 6.69                                                  | 17.55           | 26.61           | 23.68                              | 8.96                                      |
|         | P3            | 6.75                                                  | 18.82           | 26.21           | 25.34                              | 10.1                                      |
| F value | Y             | 34.05**                                               | 9.76**          | NS              | 217**                              | 181.89**                                  |
|         | P             | 4.61*                                                 | NS              | 8.35**          | 9.59**                             | 15.27**                                   |
|         | N             | NS                                                    | NS              | 96.71**         | 28.61**                            | 59.73**                                   |
|         | Y×P           | NS                                                    | 3.46*           | 3.39*           | 3.59*                              | NS                                        |
|         | Y×N           | NS                                                    | NS              | NS              | NS                                 | NS                                        |
|         | P×N           | NS                                                    | NS              | NS              | NS                                 | NS                                        |
|         | Y×P×N         | NS                                                    | NS              | NS              | 2.94*                              | NS                                        |

Y: year, P: Frequency of N application, N: amount of N application; Values followed by different lowercase letters indicate significant difference among treatments at 5% level. NS, not significant ( $p > 0.05$ ); \* and \*\*, significant at  $P=0.05$  and  $P=0.01$ , respectively.

Table S4. Effect of N fertilizer management on N content of ZLY819.

| Year    | Treatment | N content in stem and sheath(%) |         |          | N content in leaves (%) |         |          | N content in spike(%) |          |         |
|---------|-----------|---------------------------------|---------|----------|-------------------------|---------|----------|-----------------------|----------|---------|
|         |           | Tillering                       | Heading | Maturity | Tillering               | Heading | Maturity | Heading               | Maturity |         |
|         |           | stage                           | stage   | stage    | stage                   | stage   | stage    | stage                 | stage    |         |
| 2020    | N0        | 1.30d                           | 0.77d   | 0.28d    | 2.75d                   | 2.13d   | 1.39f    | 1.41e                 | 1.01e    |         |
|         | P1        | N1                              | 1.54c   | 0.93cd   | 0.45bc                  | 3.33c   | 2.61bc   | 1.58ef                | 1.60de   | 1.21bcd |
|         |           | N2                              | 1.78ab  | 0.97bc   | 0.53c                   | 3.64ab  | 2.76bc   | 1.79cd                | 1.91abc  | 1.23bcd |
|         |           | N3                              | 1.88a   | 1.12ab   | 0.70ab                  | 3.77a   | 3.02ab   | 1.87bc                | 1.98ab   | 1.27abc |
|         | P2        | N1                              | 1.46c   | 0.95bc   | 0.48c                   | 3.24c   | 2.60c    | 1.62de                | 1.72cd   | 1.14d   |
|         |           | N2                              | 1.70b   | 0.99bc   | 0.58bc                  | 3.54b   | 3.02ab   | 1.87bc                | 2.00ab   | 1.23bcd |
|         |           | N3                              | 1.84a   | 1.27a    | 0.76a                   | 3.66ab  | 3.24a    | 2.01ab                | 2.06a    | 1.36a   |
|         | P3        | N1                              | 1.47c   | 1.01bc   | 0.51c                   | 3.23c   | 2.57c    | 1.68cde               | 1.79bcd  | 1.17cd  |
|         |           | N2                              | 1.69b   | 1.21a    | 0.79a                   | 3.52b   | 2.81bc   | 1.74cde               | 2.11a    | 1.24bcd |
|         |           | N3                              | 1.83a   | 1.28a    | 0.74a                   | 3.65ab  | 3.30a    | 2.14a                 | 2.10a    | 1.31ab  |
| average | P1        | 1.74                            | 1.01    | 0.56     | 3.58                    | 2.8     | 1.75     | 1.83                  | 1.23     |         |
|         | P2        | 1.66                            | 1.07    | 0.61     | 3.48                    | 2.95    | 1.83     | 1.93                  | 1.24     |         |
|         | P3        | 1.66                            | 1.17    | 0.68     | 3.47                    | 2.89    | 1.85     | 2.00                  | 1.24     |         |
| 2021    | N0        | 0.90e                           | 0.66f   | 0.47e    | 2.85f                   | 2.46e   | 1.36c    | 1.49f                 | 0.86e    |         |
|         | P1        | N1                              | 1.54d   | 0.82ef   | 0.57de                  | 3.52cd  | 2.81d    | 1.59bc                | 1.53ef   | 1.15bc  |
|         |           | N2                              | 1.70bc  | 0.89de   | 0.66bcd                 | 3.77b   | 3.19c    | 1.84a                 | 1.85cd   | 1.17bc  |
|         |           | N3                              | 1.81a   | 0.92de   | 0.61cde                 | 3.94a   | 3.40bc   | 1.81ab                | 1.81cd   | 1.19ab  |
|         | P2        | N1                              | 1.48d   | 1.01bcd  | 0.63cde                 | 3.43d   | 3.16c    | 1.76ab                | 1.74de   | 1.04cb  |
|         |           | N2                              | 1.63c   | 1.09abc  | 0.74abc                 | 3.58c   | 3.37bc   | 1.97a                 | 2.09b    | 1.18ab  |
|         |           | N3                              | 1.72b   | 1.14ab   | 0.82ab                  | 3.80b   | 3.51ab   | 1.98a                 | 1.95bc   | 1.21ab  |
|         | P3        | N1                              | 1.51d   | 0.95cde  | 0.66bcd                 | 3.30e   | 3.22bc   | 1.88a                 | 1.84cd   | 1.01d   |
|         |           | N2                              | 1.65bc  | 1.23a    | 0.79abc                 | 3.62c   | 3.40bc   | 1.97a                 | 2.30a    | 1.19ab  |
|         |           | N3                              | 1.71b   | 1.23a    | 0.85a                   | 3.82ab  | 3.70a    | 1.97a                 | 2.07b    | 1.30a   |
| average | P1        | 1.69                            | 0.88    | 0.61     | 3.74                    | 3.14    | 1.75     | 1.73                  | 1.17     |         |
|         | P2        | 1.61                            | 1.08    | 0.73     | 3.60                    | 3.35    | 1.91     | 1.93                  | 1.14     |         |
|         | P3        | 1.62                            | 1.13    | 0.76     | 3.58                    | 3.44    | 1.94     | 2.07                  | 1.17     |         |
| F value | Y         | 12.04**                         | NS      | 10.28**  | 33.00**                 | 66.09** | NS       | NS                    | 17.01**  |         |
|         | P         | 11.90**                         | 18.62** | 9.22**   | 14.48**                 | 5.97**  | 7.23**   | 17.72**               | NS       |         |
|         | N         | 152.89**                        | 19.84** | 19.11**  | 123.71**                | 34.01** | 22.88**  | 36.71**               | 21.95**  |         |
|         | Y×P       | NS                              | NS      | NS       | NS                      | NS      | NS       | NS                    | NS       |         |
|         | Y×N       | 6.47**                          | NS      | NS       | NS                      | NS      | 4.18*    | NS                    | NS       |         |
|         | P×N       | NS                              | NS      | NS       | NS                      | NS      | NS       | NS                    | 2.8*     |         |
|         | Y×P×N     | NS                              | NS      | NS       | NS                      | NS      | NS       | NS                    | NS       |         |

Y: year, P: frequency of N application, N: amount of N application. Values followed by different lowercase letters indicate significant difference among treatments at 5% level. NS, not significant( $p > 0.05$ ); \* and \*\*, significant at  $P=0.05$  and  $P=0.01$ , respectively.
